# Supplementary material for: Genetic and Epigenetic Alterations Induced by Pesticide Exposure: Integrated Analysis of Gene Expression, microRNA Expression, and DNA Methylation Datasets
Source: MDPI journal article supplement (doi:10.3390/ijerph18168697), 2021-08-17
Supplement: s1 [file s1]

**A**

| Gene ID | Tumor Cell Line |          |           |
|---------|-----------------|----------|-----------|
|         | MCF7            | SK-N-MC  | HepG2     |
|         | GSE109509       | GSE35642 | GSE109513 |
| OBSL1   | -0.1936         | -0.0995  | -0.234    |
| HPS1    | -0.1567         | -0.0984  | -0.231    |
| SLC44A1 | 0.2344          |          | 0.193     |
| MMP28   | 0.1731          |          | 0.256     |
| MAP4K1  | -0.1939         | -0.187   | -0.352    |
| KLF9    |                 | -0.42    | -0.220    |
| BRD4    |                 | -0.635   | -0.215    |
| FANCC   | -0.2289         | -0.595   | -0.178    |
| GTSE1   | -0.2574         | -0.292   |           |
| ITPR2   | -0.2215         | -0.336   |           |
| TFDP1   | -0.2095         | -0.109   |           |
| PCDH7   | -0.3876         | -0.326   |           |
| MLX     | -0.1487         | -0.115   |           |
| PEX2    | -0.1480         | -0.159   | -0.189    |

**B**

| Gene ID  | Normal Cell Line |           |
|----------|------------------|-----------|
|          | hESC             | HepaRG    |
|          | GSE94521         | GSE109511 |
| HPS1     | 0.289            | 0.310     |
| SLC44A1  | 0.226            | 0.146     |
| ATP6V0E1 | 0.323            | 0.347     |
| MED27    | 0.267            | 0.149     |
| HIPK2    | 0.312            | 0.161     |
| PAWR     | 0.278            | 0.290     |
| PTP4A3   | -0.180           | -0.280    |
| WSB1     | 0.181            | 0.311     |
| ADD2     | 0.244            | 0.311     |
| ZMAT3    | 0.318            | 0.176     |
| UBE2D2   | 0.114            | 0.233     |
| RUBCN    | 0.243            | 0.219     |
| ITPR2    | 0.258            | 0.582     |
| PTBP1    | -0.149           | -0.118    |
| PKN2     | 0.168            | 0.240     |
| FANCA    | -0.184           | -0.206    |
| MLX      | -0.135           | -0.290    |
| ADCY1    | -0.218           | -0.257    |

**Figure S1.** Dysregulated genes with concordant expression levels in the three datasets of normal cells and the two datasets of tumor cells. The fold change values are expressed as log2 of fold change. Up-regulated genes are highlighted with red scale boxes while down-regulated genes are high-lighted with blue scale boxes.
